# Supplementary material for: “Visual thinking strategies” improves radiographic observational skills but not chart interpretation in third and fourth year veterinary students
Source: PubMed Central journal article supplement (PMC11664864; doi:10.3389/fvets.2024.1480301), 2024-12-09
Supplement: Data_Sheet_3.pdf [file Data_Sheet_3.pdf]

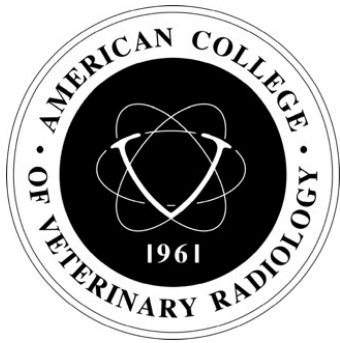

# ACVR Certifying Examination Examiner Scoring Guidelines

## Observation (weighting – 40%)

| <i>Points</i> | <i>Guideline</i>                                                                                                              |
|---------------|-------------------------------------------------------------------------------------------------------------------------------|
| 0             | Total failure (did not identify any abnormalities); normal findings reported as abnormal; or did not review case.             |
| 1             | Missed or incorrect findings have a detrimental impact on case. Candidate identifies only minor abnormalities.                |
| 2             | Missed or incorrect findings have moderate impact on case. Candidate identifies some major or minor abnormalities.            |
| 3             | Missed or incorrect findings have minimal to no impact on case. Candidate identifies most major and some minor abnormalities. |
| 4             | Candidate accurately describes all major and most minor abnormalities.                                                        |

## Synthesis (weighting – 60%)

| <i>Points</i> | <i>Guideline</i>                                                                                                                   |
|---------------|------------------------------------------------------------------------------------------------------------------------------------|
| 0             | Total failure. Pathological significance of major abnormalities are not recognized or are interpreted incorrectly                  |
| 1             | Pathological significance of some major abnormalities incompletely recognized; incomplete or some incorrect differential diagnoses |
| 2             | Pathological significance of most major abnormalities recognized; plausible differential diagnoses but incorrect prioritization    |
| 3             | Pathological significance of all major abnormalities recognized; accurate prioritized differential diagnoses                       |
